# Supplementary material for: Biological properties of mucus from land snails (Lissachatina fulica) and freshwater snails (Pomacea canaliculata) and histochemical study of mucous cells in their foot
Source: PeerJ. 2023 Aug 11;11:e15827. doi: 10.7717/peerj.15827 (PMC10424676; doi:10.7717/peerj.15827)
Supplement: Supplemental Information 1 [file peerj-11-15827-s001.xlsx]

## Sheet: Sheet1
	ABTS	% inhibition				Total antioxidant	mg AAE/g				Reducing power	mg AAE/g
	Rep.	1	2	3		Rep.	1	2	3		Rep.	1	2	3
	L. fulica	4.69215	1.44632	2.26176		L. fulica	45.7463	42.2761	46.0945		L. fulica	33.3125	39.5625	35.1875
	P. canaliculata	0.770469	1.55991	2.56919		P. canaliculata	35.0537	30.2985	34.4527		P. canaliculata	42.6875	41.75	46.4375
	gallic acid	79.726	78.4932	81.1733
