# Supplementary material for: Biological properties of mucus from land snails (Lissachatina fulica) and freshwater snails (Pomacea canaliculata) and histochemical study of mucous cells in their foot
Source: PeerJ. 2023 Aug 11;11:e15827. doi: 10.7717/peerj.15827 (PMC10424676; doi:10.7717/peerj.15827)
Supplement: Supplemental Information 3 [file peerj-11-15827-s003.xlsx]

## Sheet: Sheet1
	Alcain Blue	%			Alcain Blue	%			PAS	%			PAS	%
	P. canaliculata	dorsal	ventral		L. fulica	dorsal	ventral		P. canaliculata	dorsal	ventral		L. fulica	dorsal	ventral
	1	8.975	1.725		1	13.5	7.8375		1	10.4	2.695		1	19.08	18.33
	2	9.695	3.14		2	12.22	8.77		2	10.335	2.255		2	18.16	17.79
	3	9.825	3.455		3	12.03	11.29		3	11.025	1.41		3	10.96	9.54
	4	8.955	3.205		4	12.1075	12.805		4	12.63	2.515		4	18.81	17.57
	5	19.495	2.505		5	16.09	8.38		5	12.44	2.57		5	18.27	12.19
	6	12.7	3.07		6	12.75	6.015		6	11.605	2.075		6	18.92	18.98
	7	10.475	2.17		7	13.585	12.41		7	12.015	2.94		7	12.31	11.19
	8	15.465	2.7575		8	9.965	16.19		8	13.24	2.45		8	17.86	16.14
	9	12.655	2.385		9	20.68	11.35		9	9.955	2		9	19.65	18.85
	10	20.22	2.77		10	23.32	12.57		10	8.255	1.62		10	12.38	10.32
